# Supplementary material for: Lipid oxidation and flavor changes in saturated and unsaturated fat fractions from chicken fat during a thermal process
Source: Royal Society of Chemistry journal article supplement (doi:10.1039/d3fo01061a), 2023-01-01

**Table S1**

Identified volatile compounds of saturated and unsaturated chicken fat fractions during thermal process, using GC × GC-ToFMS with retention index (RI), experimental retention index (RI<sub>exp</sub>), retention times in the first (Peak I) and in the second (Peak II) chromatographic dimensions, similarity match, reverse match, library probability and identification method.

| No.                   | Compounds                      | RI <sup>a</sup> | RI <sub>exp</sub> <sup>*b</sup> | Peak I (min) | Peak II (s) | Similarity match | Reverse match | Library probability | Identification method <sup>c</sup> | Unsaturated |     |     | Saturated |     |     |
|-----------------------|--------------------------------|-----------------|---------------------------------|--------------|-------------|------------------|---------------|---------------------|------------------------------------|-------------|-----|-----|-----------|-----|-----|
|                       |                                |                 |                                 |              |             |                  |               |                     |                                    | 0 h         | 1 h | 2 h | 0 h       | 1 h | 2 h |
| <b>Aldehydes (29)</b> |                                |                 |                                 |              |             |                  |               |                     |                                    |             |     |     |           |     |     |
| 1                     | Pentanal                       | 979             | 970                             | 9.00         | 2.43        | 916              | 923           | 8900                | MS, RI                             | +           | +   | +   | +         | +   | +   |
| 2                     | 2-Ethylbutanal                 | 1018            | 974                             | 9.75         | 2.84        | 875              | 887           | 7353                | MS, RI                             | -           | -   | +   | -         | +   | -   |
| 3                     | Hexanal                        | 1083            | 1028                            | 12.83        | 2.81        | 932              | 941           | 8714                | MS, RI                             | +           | +   | +   | +         | +   | +   |
| 4                     | Heptanal                       | 1184            | 1154                            | 17.42        | 3.09        | 939              | 939           | 8641                | MS, RI                             | +           | +   | +   | +         | +   | +   |
| 5                     | Octanal                        | 1289            | 1272                            | 22.25        | 3.22        | 956              | 968           | 9390                | MS, RI                             | +           | +   | +   | +         | +   | +   |
| 6                     | Nonanal                        | 1391            | 1382                            | 27.00        | 3.34        | 941              | 941           | 8407                | MS, RI                             | +           | +   | +   | +         | +   | +   |
| 7                     | Decanal                        | 1498            | 1487                            | 31.50        | 3.34        | 878              | 882           | 5058                | MS, RI                             | -           | +   | +   | -         | +   | +   |
| 8                     | Undecanal                      | 1604            | 1593                            | 35.75        | 3.40        | 937              | 943           | 6143                | MS, RI                             | -           | +   | +   | -         | +   | +   |
| 9                     | Dodecanal                      | 1711            | 1699                            | 39.83        | 3.43        | 890              | 899           | 4569                | MS, RI                             | -           | -   | +   | -         | -   | +   |
| 10                    | ( <i>E</i> )-2-Butenal         | 1039            | 1018                            | 12.50        | 2.06        | 892              | 932           | 7877                | MS, RI                             | -           | +   | +   | +         | +   | +   |
| 11                    | ( <i>E</i> )-2-Pentenal        | 1127            | 1107                            | 14.83        | 2.42        | 859              | 889           | 7102                | MS, RI                             | +           | +   | +   | -         | +   | +   |
| 12                    | ( <i>Z</i> )-3-Hexenal         | 1142            | 1129                            | 16.42        | 2.60        | 854              | 859           | 6681                | MS, RI                             | -           | -   | +   | -         | -   | +   |
| 13                    | ( <i>E</i> )-2-Hexenal         | 1213            | 1207                            | 19.50        | 2.54        | 905              | 913           | 6337                | MS, RI                             | -           | +   | +   | +         | +   | +   |
| 14                    | ( <i>Z</i> )-4-Heptenal        | 1240            | 1209                            | 19.58        | 2.76        | 864              | 877           | 6026                | MS, RI                             | -           | +   | +   | -         | +   | +   |
| 15                    | ( <i>E</i> )-2-Heptenal        | 1323            | 1306                            | 23.75        | 2.73        | 940              | 945           | 7949                | MS, RI                             | +           | +   | +   | +         | +   | +   |
| 16                    | ( <i>E</i> )-2-Octenal         | 1429            | 1415                            | 28.42        | 2.91        | 952              | 963           | 7549                | MS, RI                             | +           | +   | +   | +         | +   | +   |
| 17                    | ( <i>E</i> )-2-Nonenal         | 1534            | 1522                            | 32.92        | 2.97        | 953              | 962           | 7031                | MS, RI                             | -           | +   | +   | -         | +   | +   |
| 18                    | ( <i>Z</i> )-4-Decenal         | 1544            | 1538                            | 33.58        | 3.00        | 901              | 903           | 5327                | MS, RI                             | -           | -   | +   | -         | -   | +   |
| 19                    | ( <i>E</i> )-2-Decenal         | 1644            | 1629                            | 37.17        | 3.04        | 926              | 929           | 7399                | MS, RI                             | -           | -   | +   | -         | -   | -   |
| 20                    | 2-Undecenal                    | 1751            | 1739                            | 41.33        | 3.06        | 913              | 918           | 6219                | MS, RI                             | -           | +   | +   | -         | +   | +   |
| 21                    | ( <i>E</i> )-2-Dodecenal       | 1867            | 1852                            | 45.00        | 2.28        | 900              | 901           | 4514                | MS, RI                             | -           | -   | +   | -         | -   | -   |
| 22                    | ( <i>E,E</i> )-2,4-Hexadienal  | 1400            | 1385                            | 27.17        | 2.30        | 886              | 910           | 7006                | MS, RI                             | -           | +   | +   | -         | +   | +   |
| 23                    | ( <i>E,E</i> )-2,4-Heptadienal | 1495            | 1475                            | 31.00        | 2.50        | 903              | 904           | 5346                | MS, RI                             | -           | +   | +   | -         | +   | +   |
| 24                    | ( <i>E,E</i> )-2,4-Octadienal  | 1604            | 1572                            | 34.92        | 2.52        | 898              | 906           | 6950                | MS, RI                             | -           | +   | +   | -         | +   | +   |
| 25                    | ( <i>E,E</i> )-2,4-Nonadienal  | 1700            | 1683                            | 39.25        | 2.59        | 916              | 925           | 3936                | MS, RI                             | -           | +   | +   | -         | +   | +   |
| 26                    | ( <i>E,E</i> )-2,4-Decadienal  | 1811            | 1794                            | 43.42        | 2.91        | 908              | 916           | 7343                | MS, RI                             | -           | +   | +   | -         | +   | +   |
| 27                    | Benzaldehyde                   | 1520            | 1501                            | 32.08        | 2.34        | 932              | 939           | 7949                | MS, RI                             | +           | +   | +   | +         | +   | +   |

|    |                                       |      |      |       |      |     |     |      |        |   |   |   |   |   |   |
|----|---------------------------------------|------|------|-------|------|-----|-----|------|--------|---|---|---|---|---|---|
| 28 | 3-Methylbenzaldehyde                  | 1626 | 1597 | 35.92 | 2.53 | 863 | 904 | 5301 | MS, RI | - | + | + | - | - | + |
| 29 | Benzeneacetaldehyde                   | 1640 | 1622 | 36.92 | 2.35 | 858 | 883 | 6179 | MS, RI | + | - | - | - | + | - |
|    | <b>Ketones (30)</b>                   |      |      |       |      |     |     |      | MS, RI |   |   |   |   |   |   |
| 30 | 3-Hexanone                            | 1053 | 992  | 11.67 | 2.85 | 900 | 905 | 7917 | MS, RI | - | - | + | - | + | - |
| 31 | 2-Hexanone                            | 1083 | 1026 | 12.75 | 2.76 | 914 | 915 | 7096 | MS, RI | - | + | + | - | + | + |
| 32 | 3-Heptanone                           | 1161 | 1118 | 16.00 | 3.16 | 866 | 883 | 6973 | MS, RI | - | + | + | - | - | + |
| 33 | 2-Heptanone                           | 1182 | 1150 | 17.25 | 3.00 | 905 | 933 | 7257 | MS, RI | + | + | + | + | + | + |
| 34 | 4-Octanone                            | 1234 | 1203 | 19.33 | 3.42 | 906 | 907 | 7788 | MS, RI | - | + | + | - | + | + |
| 35 | 2-Octanone                            | 1287 | 1266 | 22.00 | 3.13 | 944 | 944 | 7737 | MS, RI | - | + | + | - | + | + |
| 36 | 2-Nonanone                            | 1391 | 1376 | 26.75 | 3.23 | 917 | 944 | 7059 | MS, RI | - | + | + | - | + | + |
| 37 | 2-Decanone                            | 1494 | 1479 | 31.17 | 3.31 | 924 | 925 | 7192 | MS, RI | - | + | + | - | + | + |
| 38 | 6-Undecanone                          | 1558 | 1516 | 32.67 | 3.68 | 902 | 922 | 8372 | MS, RI | - | - | + | - | - | - |
| 39 | 2-Undecanone                          | 1598 | 1586 | 35.50 | 3.34 | 925 | 932 | 6007 | MS, RI | - | - | + | - | - | + |
| 40 | 5-Methyl-3-heptanone                  | 1265 | 1234 | 20.67 | 3.34 | 890 | 890 | 6195 | MS, RI | - | + | + | - | + | + |
| 41 | 1-Hydroxy-2-propanone                 | 1303 | 1271 | 22.25 | 1.77 | 951 | 961 | 9129 | MS, RI | + | - | + | + | + | + |
| 42 | 1-Hydroxy-2-butanone                  | 1388 | 1348 | 25.58 | 1.89 | 880 | 880 | 7978 | MS, RI | - | + | + | - | + | + |
| 43 | 1-Penten-3-one                        | 1019 | 940  | 10.42 | 2.32 | 901 | 927 | 8639 | MS, RI | - | + | + | - | + | + |
| 44 | 3-Penten-2-one                        | 1128 | 1082 | 14.67 | 2.37 | 892 | 911 | 6028 | MS, RI | - | + | + | - | + | + |
| 45 | 3-Hexen-2-one                         | 1213 | 1186 | 18.67 | 2.60 | 901 | 918 | 3932 | MS, RI | - | - | + | - | - | - |
| 46 | 1-Octen-3-one                         | 1300 | 1283 | 22.75 | 3.00 | 867 | 879 | 6199 | MS, RI | - | + | + | - | + | + |
| 47 | 2,3-Pentanedione                      | 1058 | 1001 | 11.92 | 2.18 | 928 | 939 | 9436 | MS, RI | + | + | + | - | + | + |
| 48 | (E)-3-Octen-2-one                     | 1396 | 1391 | 27.42 | 2.88 | 902 | 902 | 5397 | MS, RI | - | + | + | - | + | + |
| 49 | (E)-3-Nonen-2-one                     | 1523 | 1495 | 31.83 | 2.94 | 870 | 870 | 4888 | MS, RI | - | + | + | - | + | + |
| 50 | (E,E)-3,5-Octadien-2-one              | 1540 | 1501 | 32.08 | 2.63 | 855 | 860 | 4740 | MS, RI | - | - | + | - | - | - |
| 51 | Cyclopentanone                        | 1174 | 1146 | 17.08 | 2.70 | 906 | 913 | 8838 | MS, RI | - | + | + | - | + | + |
| 52 | 2-Methylcyclopentanone                | 1177 | 1156 | 17.50 | 2.94 | 919 | 931 | 6373 | MS, RI | - | + | + | - | + | + |
| 53 | 2-Ethylcyclopentanone                 | 1314 | 1262 | 21.83 | 3.14 | 875 | 884 | 7201 | MS, RI | - | - | + | - | - | - |
| 54 | Cyclohexanone                         | 1291 | 1264 | 21.92 | 2.99 | 884 | 887 | 7041 | MS, RI | - | + | + | - | + | + |
| 55 | 2-Cyclopentenone                      | 1345 | 1331 | 24.83 | 2.37 | 920 | 937 | 9089 | MS, RI | - | + | + | - | + | + |
| 56 | 3-Ethyl-2-cyclopenten-1-one           | 1600 | 1607 | 36.33 | 2.59 | 856 | 883 | 5407 | MS, RI | - | - | - | - | - | + |
| 57 | 3-Methylcyclopentane-1,2-dione        | 1781 | 1794 | 43.42 | 1.95 | 890 | 898 | 7163 | MS, RI | - | - | - | - | + | + |
| 58 | 3-Ethyl-2-hydroxy-2-cyclopenten-1-one | 1894 | 1868 | 45.42 | 1.73 | 906 | 922 | 6680 | MS, RI | - | + | + | - | + | + |
| 59 | Acetophenone                          | 1649 | 1629 | 37.17 | 2.44 | 889 | 895 | 6425 | MS, RI | + | + | - | + | + | + |

|    |                          |      |      |       |      |     |     |      |        |   |   |   |   |   |   |
|----|--------------------------|------|------|-------|------|-----|-----|------|--------|---|---|---|---|---|---|
|    | <b>Alcohols (27)</b>     |      |      |       |      |     |     |      | MS, RI |   |   |   |   |   |   |
| 60 | Butanol                  | 1138 | 1101 | 15.33 | 1.85 | 926 | 928 | 8770 | MS, RI | + | + | + | + | + | + |
| 61 | Pentanol                 | 1250 | 1222 | 20.17 | 2.05 | 972 | 979 | 7637 | MS, RI | + | + | + | + | + | + |
| 62 | Glycerin                 | 1355 | 1335 | 25.00 | 2.03 | 898 | 899 | 3592 | MS, RI | - | + | - | + | - | - |
| 63 | Octanol                  | 1565 | 1538 | 33.58 | 2.19 | 901 | 905 | 3760 | MS, RI | + | + | + | + | + | + |
| 64 | Heptanol                 | 1457 | 1436 | 29.33 | 2.11 | 915 | 916 | 6230 | MS, RI | + | + | + | + | + | + |
| 65 | Nonanol                  | 1660 | 1642 | 37.67 | 2.27 | 900 | 900 | 3080 | MS, RI | - | + | + | - | + | + |
| 66 | Cyclohexanol             | 1403 | 1379 | 26.92 | 2.18 | 894 | 894 | 5156 | MS, RI | - | - | - | - | + | - |
| 67 | 3-Hexanol                | 1198 | 1165 | 17.83 | 2.12 | 876 | 878 | 7385 | MS, RI | - | - | + | - | - | - |
| 68 | 2-Hexanol                | 1220 | 1192 | 18.92 | 2.12 | 862 | 874 | 4053 | MS, RI | - | - | - | - | - | + |
| 69 | 4-Heptanol               | 1281 | 1261 | 21.83 | 2.23 | 881 | 886 | 5378 | MS, RI | - | - | + | - | - | - |
| 70 | 3-Heptanol               | 1290 | 1275 | 22.42 | 2.26 | 893 | 904 | 7203 | MS, RI | - | + | + | - | + | + |
| 71 | 2-Heptanol               | 1320 | 1300 | 23.50 | 2.17 | 929 | 930 | 4661 | MS, RI | - | + | + | - | - | - |
| 72 | 4-Octanol                | 1376 | 1364 | 26.25 | 2.35 | 895 | 895 | 7432 | MS, RI | - | + | + | - | + | + |
| 73 | 3-Octanol                | 1393 | 1377 | 26.83 | 2.36 | 880 | 893 | 8177 | MS, RI | - | + | + | - | + | + |
| 74 | 2-Ethylhexanol           | 1491 | 1471 | 30.83 | 2.21 | 894 | 905 | 6818 | MS, RI | + | + | - | + | + | - |
| 75 | 1-Penten-3-ol            | 1159 | 1120 | 16.08 | 1.88 | 902 | 909 | 6724 | MS, RI | + | + | + | + | + | + |
| 76 | (Z)-3-Penten-1-ol        | 1307 | 1281 | 22.67 | 1.93 | 906 | 907 | 3986 | MS, RI | - | + | + | - | + | + |
| 77 | (E)-2-Penten-1-ol        | 1312 | 1289 | 23.00 | 1.87 | 914 | 915 | 5443 | MS, RI | - | - | + | - | - | - |
| 78 | (Z)-2-Penten-1-ol        | 1318 | 1296 | 23.33 | 1.87 | 934 | 934 | 7374 | MS, RI | - | + | + | - | + | + |
| 79 | (E)-2-Hexen-1-ol         | 1405 | 1385 | 27.17 | 1.98 | 886 | 886 | 6983 | MS, RI | - | - | - | - | - | + |
| 80 | 1-Octen-3-ol             | 1450 | 1432 | 29.17 | 2.14 | 897 | 897 | 6172 | MS, RI | + | + | + | + | + | + |
| 81 | (E)-2-Octen-1-ol         | 1614 | 1592 | 35.75 | 2.13 | 893 | 893 | 3703 | MS, RI | - | + | + | - | + | + |
| 82 | (Z)-3-Nonen-1-ol         | 1682 | 1666 | 38.58 | 2.22 | 871 | 874 | 2294 | MS, RI | - | - | + | - | - | - |
| 83 | 1-Ethoxypropan-2-ol      | 1163 | 1126 | 16.33 | 2.08 | 866 | 866 | 7916 | MS, RI | + | - | - | + | - | - |
| 84 | 1-Propoxypropan-2-ol     | 1264 | 1216 | 19.92 | 2.24 | 906 | 909 | 8120 | MS, RI | + | - | - | + | - | - |
| 85 | Diethylene glycol        | 1972 | 1932 | 46.75 | 1.49 | 887 | 904 | 8966 | MS, RI | - | - | - | + | - | - |
|    | <b>Hydrocarbons (18)</b> |      |      |       |      |     |     |      | MS, RI |   |   |   |   |   |   |
| 86 | Decane                   | 1000 | 922  | 10.0  | 0.26 | 899 | 907 | 4137 | MS, RI | - | + | + | + | - | + |
| 87 | Undecane                 | 1100 | 1062 | 14.00 | 0.97 | 899 | 906 | 3605 | MS, RI | - | + | + | - | + | + |
| 88 | Dodecane                 | 1200 | 1177 | 18.33 | 1.31 | 891 | 900 | 1582 | MS, RI | - | - | - | + | - | + |
| 89 | Tridecane                | 1300 | 1294 | 23.25 | 1.12 | 920 | 925 | 2942 | MS, RI | - | + | + | + | + | + |
| 90 | Tetradecane              | 1400 | 1396 | 27.67 | 1.09 | 914 | 921 | 1699 | MS, RI | - | - | + | - | - | - |

|     |                           |      |      |       |      |     |     |      |        |   |   |   |   |   |   |
|-----|---------------------------|------|------|-------|------|-----|-----|------|--------|---|---|---|---|---|---|
| 91  | Decene                    | 1050 | 983  | 11.42 | 4.79 | 910 | 913 | 2331 | MS, RI | - | + | + | - | - | + |
| 92  | Decyne                    | 1229 | 1207 | 19.50 | 3.44 | 874 | 874 | 2760 | MS, RI | - | - | - | + | - | - |
| 93  | Toluene                   | 1042 | 968  | 11.08 | 2.75 | 946 | 946 | 5573 | MS, RI | + | - | - | + | - | - |
| 94  | Ethylbenzene              | 1129 | 1077 | 14.50 | 3.24 | 921 | 923 | 6514 | MS, RI | + | + | - | + | + | - |
| 95  | p-Xylene                  | 1138 | 1099 | 15.25 | 3.14 | 922 | 932 | 3056 | MS, RI | + | + | - | + | + | - |
| 96  | o-Xylene                  | 1186 | 1150 | 17.25 | 3.16 | 918 | 939 | 4117 | MS, RI | + | + | + | + | + | + |
| 97  | (-)-Limonene              | 1199 | 1165 | 17.83 | 4.28 | 906 | 920 | 7113 | MS, RI | - | - | - | + | + | + |
| 98  | Propylbenzene             | 1212 | 1180 | 18.42 | 3.53 | 888 | 918 | 7196 | MS, RI | + | + | + | - | - | + |
| 99  | Isopropylbenzene          | 1226 | 1197 | 19.08 | 3.51 | 886 | 923 | 5493 | MS, RI | + | + | - | + | - | - |
| 100 | Styrene                   | 1261 | 1232 | 20.58 | 2.75 | 924 | 924 | 3509 | MS, RI | + | - | - | + | + | - |
| 101 | 1,3,5,7-Cyclooctatetraene | 1244 | 1252 | 21.42 | 2.64 | 900 | 919 | 4125 | MS, RI | + | - | + | - | - | - |
| 102 | 3-Ethylstyrene            | 1424 | 1420 | 28.67 | 3.15 | 870 | 881 | 1723 | MS, RI | - | - | + | - | - | - |
| 103 | Azulene                   | 1729 | 1717 | 40.50 | 2.78 | 878 | 893 | 6082 | MS, RI | + | + | + | + | + | + |
|     | <b>Phenols (2)</b>        |      |      |       |      |     |     |      | MS, RI |   |   |   |   |   |   |
| 104 | Butylated Hydroxytoluene  | 1909 | 1893 | 46.08 | 2.09 | 887 | 900 | 8959 | MS, RI | + | - | - | + | - | - |
| 105 | p-Cresol                  | 2080 | 2038 | 48.17 | 1.44 | 867 | 879 | 5043 | MS, RI | + | - | - | - | - | - |
|     | <b>Esters (14)</b>        |      |      |       |      |     |     |      | MS, RI |   |   |   |   |   |   |
| 106 | Amyl acetate              | 1176 | 1142 | 16.92 | 3.16 | 891 | 910 | 8629 | MS, RI | - | + | + | - | + | + |
| 107 | Butyl butyrate            | 1220 | 1183 | 18.58 | 1.14 | 903 | 903 | 1864 | MS, RI | + | + | + | - | + | + |
| 108 | Hexyl formate             | 1352 | 1199 | 19.17 | 2.83 | 910 | 915 | 6967 | MS, RI | - | + | + | - | + | + |
| 109 | Dimethyl oxalate          | 1395 | 1385 | 27.17 | 2.08 | 905 | 919 | 8422 | MS, RI | - | + | + | - | + | + |
| 110 | Pentyl hexanoate          | 1501 | 1501 | 32.08 | 3.98 | 883 | 885 | 7261 | MS, RI | - | - | + | - | - | + |
| 111 | Octyl formate             | 1778 | 1743 | 41.50 | 2.35 | 871 | 899 | 2892 | MS, RI | - | - | + | - | - | - |
| 112 | $\gamma$ -Valerolactone   | 1616 | 1586 | 35.50 | 2.23 | 922 | 925 | 8495 | MS, RI | - | + | + | - | + | + |
| 113 | $\gamma$ -Butyrolactone   | 1632 | 1601 | 36.08 | 2.13 | 967 | 972 | 9848 | MS, RI | + | + | + | + | + | + |
| 114 | $\gamma$ -Caprolactone    | 1694 | 1681 | 39.17 | 2.36 | 937 | 958 | 9144 | MS, RI | + | + | + | + | + | + |
| 115 | $\delta$ -Hexalactone     | 1791 | 1765 | 42.33 | 2.39 | 916 | 918 | 8136 | MS, RI | - | + | + | - | + | + |
| 116 | $\delta$ -Valerolactone   | 1784 | 1776 | 42.75 | 2.30 | 916 | 919 | 9077 | MS, RI | - | + | + | - | + | + |
| 117 | $\gamma$ -Heptalactone    | 1787 | 1779 | 42.83 | 2.41 | 888 | 888 | 7033 | MS, RI | - | + | + | - | + | + |
| 118 | $\gamma$ -Octalactone     | 1910 | 1890 | 46.00 | 1.80 | 900 | 904 | 7590 | MS, RI | - | + | + | - | - | + |
| 119 | $\gamma$ -Nonalactone     | 2024 | 2000 | 47.75 | 1.63 | 880 | 907 | 7178 | MS, RI | - | - | + | - | - | + |
|     | <b>Acids (7)</b>          |      |      |       |      |     |     |      | MS, RI |   |   |   |   |   |   |
| 120 | Acetic acid               | 1449 | 1422 | 28.75 | 1.52 | 937 | 937 | 9762 | MS, RI | + | + | + | + | + | + |

|     |                                              |      |      |       |      |     |     |      |        |   |   |   |   |   |   |
|-----|----------------------------------------------|------|------|-------|------|-----|-----|------|--------|---|---|---|---|---|---|
| 121 | Formic acid                                  | 1504 | 1428 | 29.00 | 1.58 | 929 | 944 | 9620 | MS, RI | - | + | + | - | + | + |
| 122 | Propanoic acid                               | 1535 | 1511 | 32.50 | 1.62 | 897 | 905 | 9841 | MS, RI | + | + | + | + | + | + |
| 123 | Pentanoic acid                               | 1733 | 1696 | 37.83 | 1.74 | 890 | 943 | 7925 | MS, RI | - | + | + | - | + | + |
| 124 | Hexanoic acid                                | 1846 | 1807 | 41.67 | 1.75 | 907 | 909 | 7428 | MS, RI | - | + | + | - | + | + |
| 125 | Heptanoic acid                               | 1950 | 1909 | 44.67 | 1.66 | 880 | 884 | 7815 | MS, RI | - | - | + | - | - | - |
| 126 | Nonanoic acid                                | 2171 | 2116 | 48.58 | 1.49 | 896 | 914 | 8107 | MS, RI | - | + | + | - | + | + |
|     | <b>O-, N- or S-containing compounds (24)</b> |      |      |       |      |     |     |      | MS, RI |   |   |   |   |   |   |
| 127 | 2-Ethylfuran                                 | 950  | 897  | 8.25  | 2.38 | 930 | 931 | 7208 | MS, RI | - | - | - | - | + | - |
| 128 | 2-Propylfuran                                | 1026 | 988  | 10.83 | 2.82 | 891 | 893 | 9267 | MS, RI | - | + | + | - | + | + |
| 129 | 2-Butylfuran                                 | 1123 | 1094 | 15.08 | 3.19 | 890 | 891 | 7604 | MS, RI | - | + | + | - | + | + |
| 130 | 2-Pentylfuran                                | 1231 | 1209 | 19.58 | 3.46 | 931 | 932 | 8285 | MS, RI | + | + | + | - | + | + |
| 131 | Tetrahydro-2-furanmethanol                   | 1296 | 1246 | 21.17 | 4.27 | 867 | 884 | 4986 | MS, RI | - | - | + | - | - | - |
| 132 | 2-Hexylfuran                                 | 1321 | 1316 | 24.17 | 3.57 | 878 | 883 | 6802 | MS, RI | - | + | + | - | + | + |
| 133 | 3-Furaldehyde                                | 1458 | 1406 | 28.08 | 1.98 | 881 | 889 | 9717 | MS, RI | - | - | - | + | - | - |
| 134 | 2-Heptylfuran                                | 1421 | 1421 | 28.67 | 3.69 | 886 | 890 | 7743 | MS, RI | - | - | + | - | - | + |
| 135 | Furfural                                     | 1462 | 1440 | 29.50 | 1.99 | 910 | 910 | 9778 | MS, RI | + | + | + | + | + | + |
| 136 | 2-Octylfuran                                 | 1520 | 1524 | 33.00 | 3.77 | 878 | 878 | 7022 | MS, RI | - | - | - | - | - | + |
| 137 | 5-Methyl-2(5H)-furanone                      | 1669 | 1653 | 38.08 | 2.05 | 886 | 888 | 8851 | MS, RI | - | + | + | - | + | + |
| 138 | 3,4-Dimethyl-2,5-furandione                  | 1714 | 1707 | 40.17 | 2.14 | 889 | 889 | 8040 | MS, RI | - | - | + | - | - | + |
| 139 | 2(5H)-Furanone                               | 1742 | 1725 | 40.83 | 1.96 | 901 | 909 | 9666 | MS, RI | - | + | + | + | + | + |
| 140 | 2H-Pyran-2-one                               | 1765 | 1738 | 41.33 | 2.02 | 900 | 911 | 9388 | MS, RI | - | + | + | - | + | + |
| 141 | Pyridine                                     | 1185 | 1146 | 17.08 | 2.34 | 923 | 924 | 8944 | MS, RI | + | + | - | + | + | + |
| 142 | Pyrazine                                     | 1212 | 1177 | 18.33 | 2.22 | 887 | 914 | 7828 | MS, RI | - | - | - | - | + | - |
| 143 | 3-Ethylpyridine                              | 1378 | 1360 | 26.08 | 2.80 | 930 | 937 | 8863 | MS, RI | - | + | - | - | + | + |
| 144 | Pyrrole                                      | 1514 | 1489 | 31.58 | 1.71 | 864 | 877 | 8737 | MS, RI | + | - | - | - | - | - |
| 145 | Benzonitrile                                 | 1589 | 1582 | 35.33 | 2.25 | 922 | 925 | 9743 | MS, RI | + | + | - | + | + | - |
| 146 | Pyrrolidinecarboxaldehyde                    | 1691 | 1725 | 40.83 | 2.49 | 883 | 904 | 8986 | MS, RI | - | - | - | + | - | - |
| 147 | 2-Piperidinone                               | 2060 | 2092 | 48.75 | 1.59 | 919 | 920 | 9218 | MS, RI | - | - | - | + | - | - |
| 148 | 2-Propylthiophene                            | 1226 | 1228 | 20.42 | 3.31 | 869 | 869 | 8246 | MS, RI | - | - | - | + | - | - |
| 149 | 2-Thiophenecarboxaldehyde                    | 1684 | 1668 | 38.67 | 2.20 | 854 | 893 | 7645 | MS, RI | - | - | - | + | + | + |
| 150 | Dimethyl sulfone                             | 1903 | 1871 | 45.50 | 1.61 | 855 | 903 | 9712 | MS, RI | + | - | - | - | + | - |

**Note:** -, not detectable; +, detectable.

<sup>a</sup> RI: retention index on DB-Wax capillary column, RI was obtained from <https://webbook.nist.gov/>.

<sup>b</sup>  $RI_{exp}^*$ : calculated using n-alkanes ( $C_7$ – $C_{40}$ ) with a DB-Wax (100% polyethyleneglycol) column, as part of a DB-Wax  $\times$  DB-17 ms ([50%-phenyl]-methylpolysiloxane) column set.

<sup>c</sup> Identification method: MS, compared with NIST 2.0 Mass Spectra Database.

**Fig. S1.** Dry fractionation of fat from yellow-feathered chicken into saturated and unsaturated fat fractions

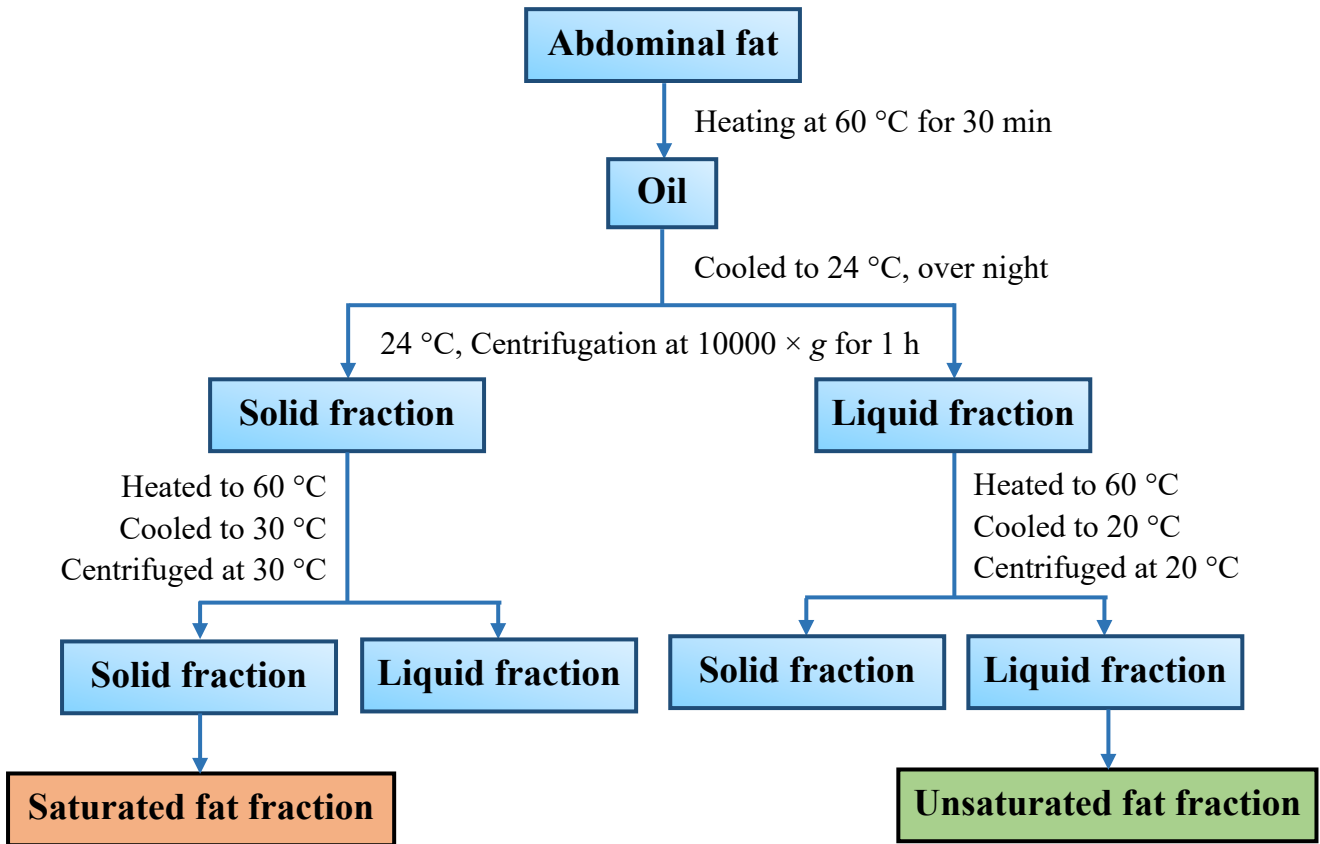

Supplement: d3fo01061a1.pdf [file d3fo01061a1.pdf]
